# Supplementary material for: Stigmasterol attenuates hepatic steatosis in rats by strengthening the intestinal barrier and improving bile acid metabolism
Source: PubMed Central journal article supplement (PMC9420112; doi:10.1038/s41538-022-00156-0), 2022-08-27

# Supplementary Figure 1

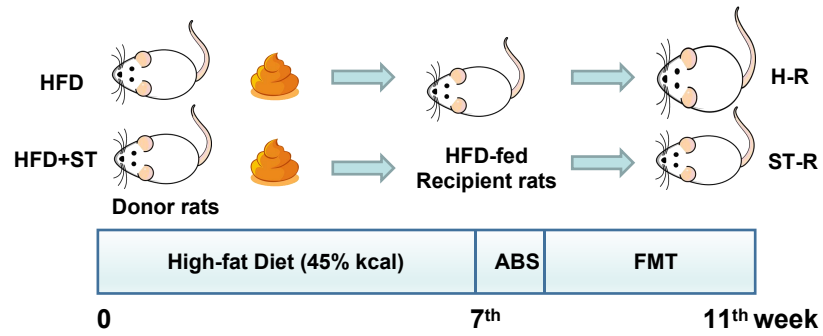

Supplement: 41538_2022_156_MOESM1_ESM.pdf [file 41538_2022_156_MOESM1_ESM.pdf]
